# Supplementary material for: Westerly Variations in the Eastern Tibetan Plateau since the Last Interglacial Revealed by the Grain-Size Records of the Ganzi Loess
Source: MDPI journal article supplement (doi:10.3390/atmos14020238), 2023-01-25
Supplement: s1 [file s1]

# Westerly Variations in the Eastern Tibetan Plateau since the Last Interglacial Revealed by the Grain-Size Records of the Ganzi Loess

Shengli Yang, Jiantao Zhou, Zixuan Chen, Pushuang Li, Chen Wen, Xuechao Xu and Qiong Li \*

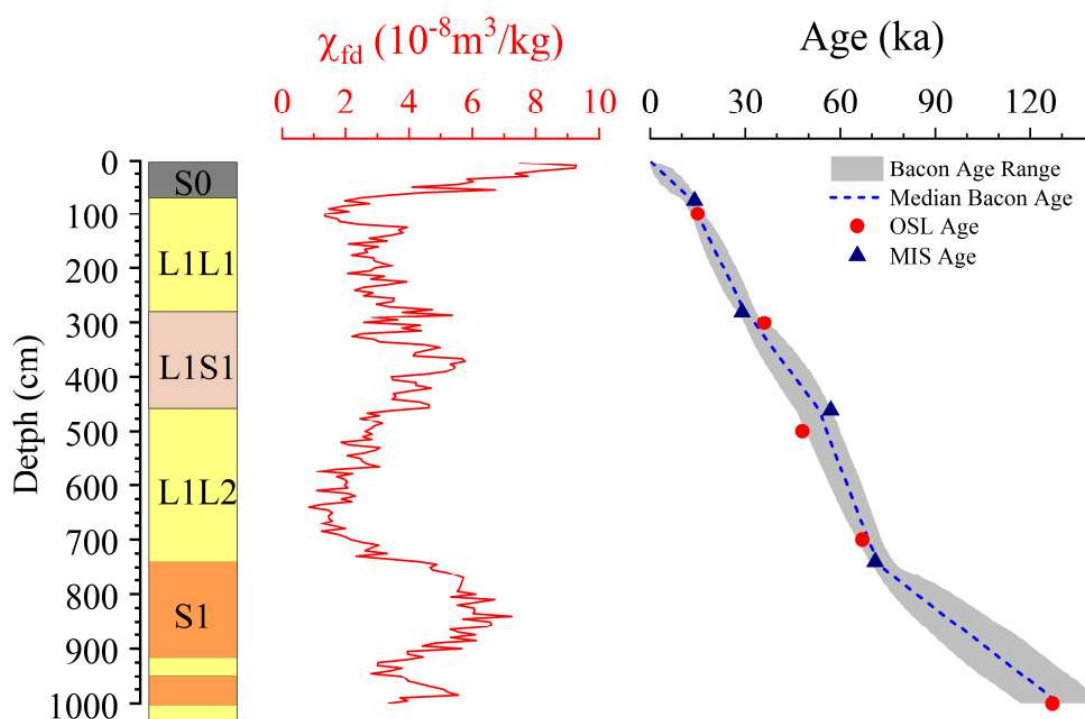

**Figure S1.** Lithology and Bacon age–depth model of the Xinshi (XS) section.

**Table S1.** Comparison of decomposition results in grain-size end-member analysis of loess sediments in different regions (unit of EM,  $\mu\text{m}$ ).

| Regions                  | EM1 | Dynamic source                        | EM2  | Dynamic source                      | EM3   | Dynamic source                               | EM4   | Dynamic source                   | EM5     | Dynamic source     | Literature source   |
|--------------------------|-----|---------------------------------------|------|-------------------------------------|-------|----------------------------------------------|-------|----------------------------------|---------|--------------------|---------------------|
| Yellow River source area | 1–3 | process of weathering and pedogenesis | 6–12 | long-existing high-level Westerlies | 20–40 | Westerlies and TPM                           | 36–70 | Westerlies and TPM               | 177–257 | strong valley wind | (Jia et al., 2022)  |
| Shandong Province        | 1   | weathering and pedogenesis            | 5.62 | high altitude westerly winds        | 15.85 | settling in the form of floating dust        | 35.48 | winter monsoon                   | 70.79   | dust storms        | (Kong et al., 2021) |
| Southern Tibetan Plateau | 8.1 | pedogenesis and the MLW               | 66.4 | derived from nearby, sandy sources  | 127   | are controlled by the same dynamic mechanism | 243   | dust storms                      |         |                    | (Gao et al., 2021)  |
| Yili Basin               | 1   | pedogenic component                   | 5    | Westerlies                          | 13    | near-ground suspension component             | 35    | near-ground suspension component |         |                    | (Wang et al., 2019) |

|                                    |       |                                                                      |        |                                             |       |                        |       |                                                        |       |                 |                      |
|------------------------------------|-------|----------------------------------------------------------------------|--------|---------------------------------------------|-------|------------------------|-------|--------------------------------------------------------|-------|-----------------|----------------------|
| NE Tibetan Plateau                 | 0.3–1 | pedogenic intensity                                                  | 5–7    | westerly winds                              | 10–17 | westerly winds         | 25–31 | low-level winds                                        | 44–63 | low-level winds | (Li et al., 2020)    |
| Altun Shan                         | 4.8   | background dust                                                      | 19.6   | surface winds                               |       |                        |       |                                                        |       |                 | (Xu et al., 2018)    |
| Altun Shan                         | 4.7   | background dust                                                      | 20.6   | surface winds                               |       |                        |       |                                                        |       |                 | (Xu et al., 2018)    |
| The southern margin of the CLP     | 2.83  | high airflow and product of the weathering or pedogenesis background | 8.56   | westerly                                    | 20.96 | EAWM                   |       |                                                        |       |                 | (Hou et al., 2021)   |
| Ningxia                            | 1–10  | deposition of dust                                                   | 10–100 | East Asian winter monsoon                   | >100  | nearby                 |       |                                                        |       |                 | (Jiang et al., 2017) |
| Lop Nur, Tarim Basin               | 63    | major dust outbreaks                                                 | 30     | low-level winds during major dust outbreaks | 10    | high-altitude westerly | 4     | runoff and the related volume of the Lop Nur paleolake |       |                 | (Liu et al., 2019)   |
| The northern slope of the Tianshan | 5.3   | Westerlies                                                           | 10.5   | Westerlies                                  | 39.8  | surface winds          |       |                                                        |       |                 | (Duan et al., 2020)  |
| Tien Shan                          | 1.6   | pedogenesis                                                          | 11     | high altitude Westerlies                    | 39.8  | near-surface winds     |       |                                                        |       |                 | (Jia et al., 2018)   |

## References

- Duan, F.; An, C.; Wang, W.; Herzschuh, U.; Zhang, M.; Zhang, H.; Liu, Y.; Zhao, Y.; Li, G. Dating of a late Quaternary loess section from the northern slope of the Tianshan Mountains (Xinjiang, China) and its paleoenvironmental significance. *Quat. Int.* **2020**, *544*, 104–112. <https://doi.org/10.1016/j.quaint.2020.02.034>.
- Gao, F.; Yang, J.; Wang, S.; Wang, Y.; Li, K.; Wang, F.; Ling, Z.; Xia, D. Variation of the winter mid-latitude Westerlies in the Northern Hemisphere during the Holocene revealed by aeolian deposits in the southern Tibetan Plateau. *Quat. Res.* **2022**, *107*, 104–112.
- Hou, K.; Qian, H.; Zhang, Y.T.; Zhang, Q.Y.; Qu, W.G. New insights into loess formation on the southern margin of the Chinese Loess Plateau. *Catena* **2021**, *204*, 105444.
- Jia, J.; Liu, H.; Gao, F.; Xia, D. Variations in the westerlies in Central Asia since 16 ka recorded by a loess section from the Tien Shan Mountains. *Palaeogeogr. Palaeoclimatol. Palaeoecol.* **2018**, *504*, 156–161.
- Jia, Y.-N.; Zhang, Y.; Huang, C.C.; Wang, N.; Qiu, H.; Wang, H.; Xiao, Q.; Chen, D.; Lin, X.; Zhu, Y.; et al. Late Pleistocene–Holocene aeolian loess–paleosol sections in the Yellow River source area on the northeast Tibetan Plateau: Chronostratigraphy, sediment provenance, and implications for paleoclimate reconstruction. *Catena* **2022**, *208*, 105777. <https://doi.org/10.1016/j.catena.2021.105777>.
- Jiang, H.C.; Wan, S.M.; Ma, X.L.; Zhong, N.; Zhao, D.B. End-member modeling of the grain-size record of Sikouzi fine sediments in Ningxia (China) and implications for temperature control of Neogene evolution of East Asian winter monsoon: *PLoS One* **2017**, *12*, 10.
- Kong, F.; Xu, S.; Han, M.; Chen, H.; Miao, X.; Kong, X.; Jia, G. Application of grain size endmember analysis in the study of dust accumulation processes: A case study of loess in Shandong Province, East China. *Sediment. Geol.* **2021**, *416*, 105868. <https://doi.org/10.1016/j.sedgeo.2021.105868>.
- Li, X.; Peng, T.; Ma, Z.; Li, M.; Li, P.; Feng, Z.; Guo, B.; Yu, H.; Ye, X.; Zhang, J.; et al. The Sources and Transport Dynamics of Eolian Sediments in the NE Tibetan Plateau Since 6.7 Ma. *Geochem. Geophys. Geosystems* **2020**, *21*, e2019GC008682. <https://doi.org/10.1029/2019gc008682>.
- Liu, J.; Wang, R.; Zhao, Y.; Yang, Y. A 40,000-year record of aridity and dust activity at Lop Nur, Tarim Basin, northwestern China. *Quat. Sci. Rev.* **2019**, *211*, 208–221. <https://doi.org/10.1016/j.quascirev.2019.03.023>.
- Wang, L.; Jia, J.; Zhao, H.; Liu, H.; Duan, Y.; Xie, H.; Zhang, D.D.; Chen, F. Optical dating of Holocene paleosol development and climate changes in the Yili Basin, arid central Asia. *Holocene* **2019**, *29*, 1068–1077. <https://doi.org/10.1177/0959683619831432>.
- Xu, Y.; Li, J.; Pan, F.; Yang, B.; Tang, Y.; Bi, Y.; Li, T.; Yue, L.; Wingate, M.T. Late Neogene aridification and wind patterns in the Asian interior: Insight from the grain-size of eolian deposits in Altun Shan, northern Tibetan Plateau. *Palaeogeogr. Palaeoclim. Palaeoecol.* **2018**, *511*, 532–540. <https://doi.org/10.1016/j.palaeo.2018.09.017>.

9

10

11

12

13

14

15

16

17

18

19

20

21

22

23

24

25

26

27

28

29

30

31

32

33

34

35

36

37

38

39

40

41

42
